# Supplementary material
Source: MDPI journal article supplement (https://www.mdpi.com/1999-4907/10/8/688)

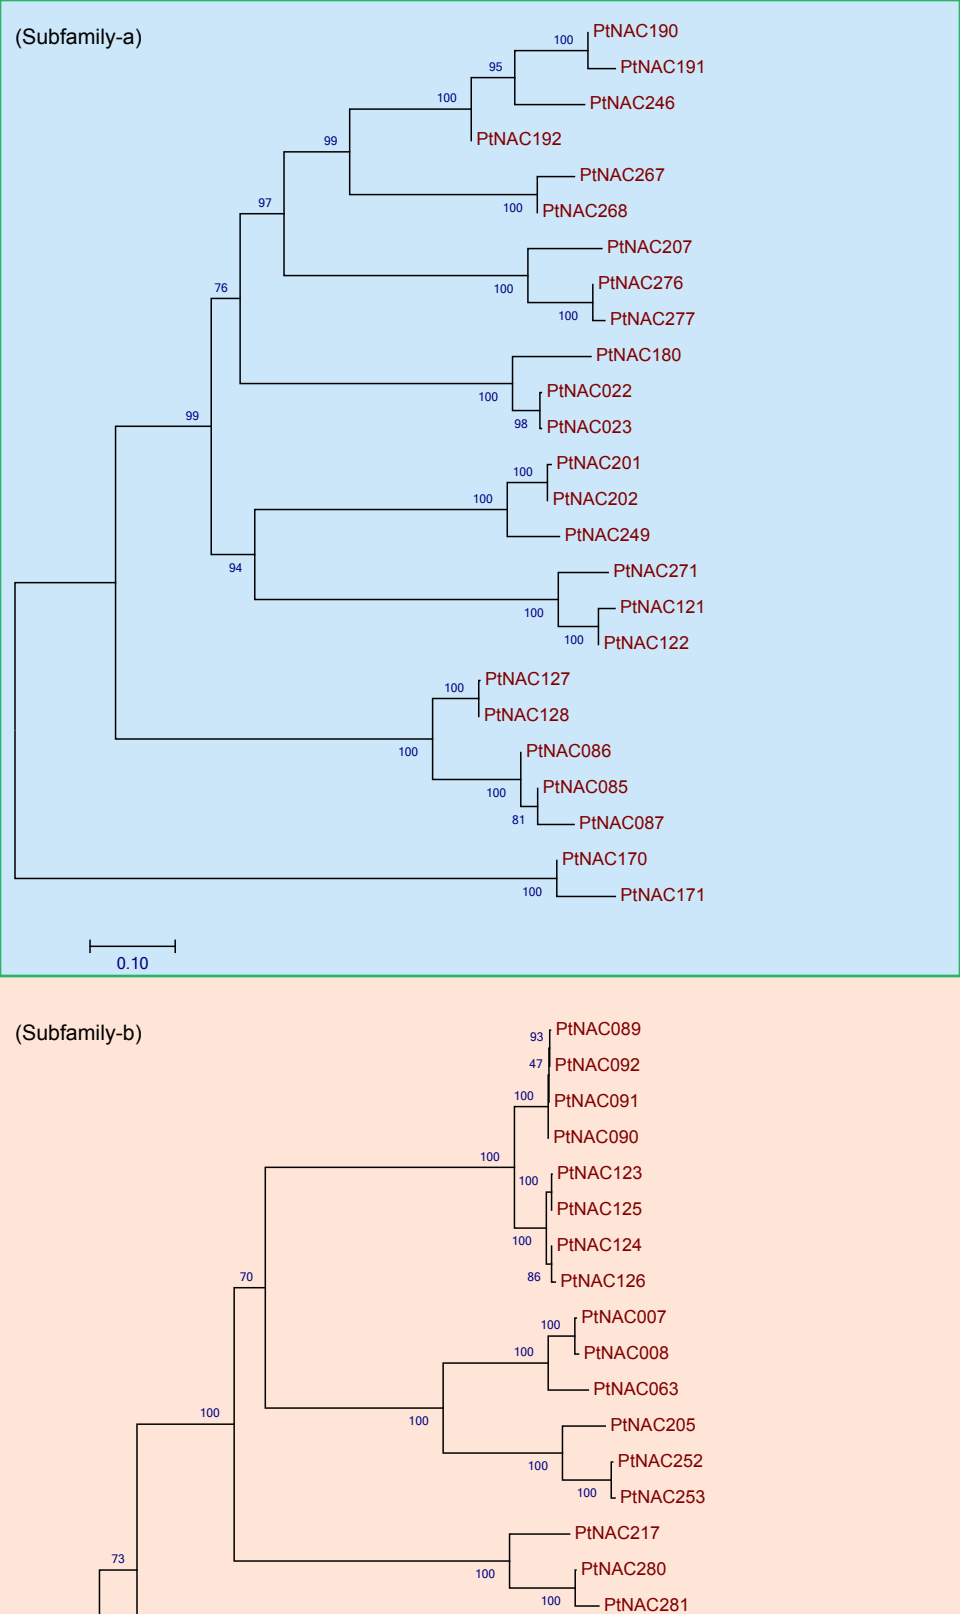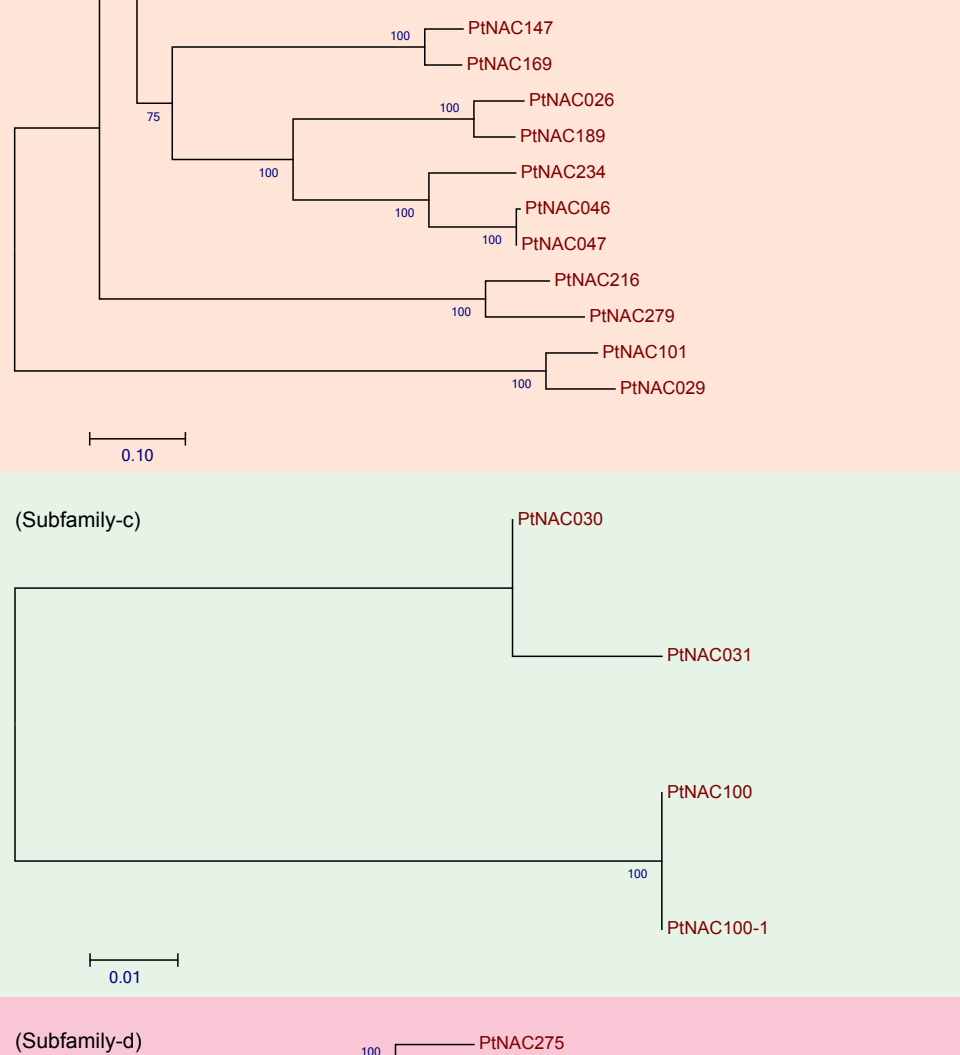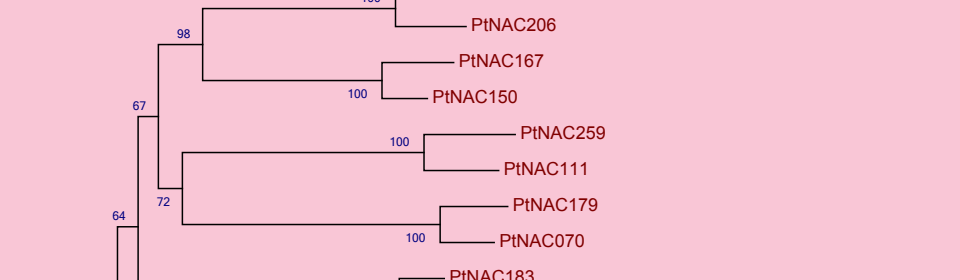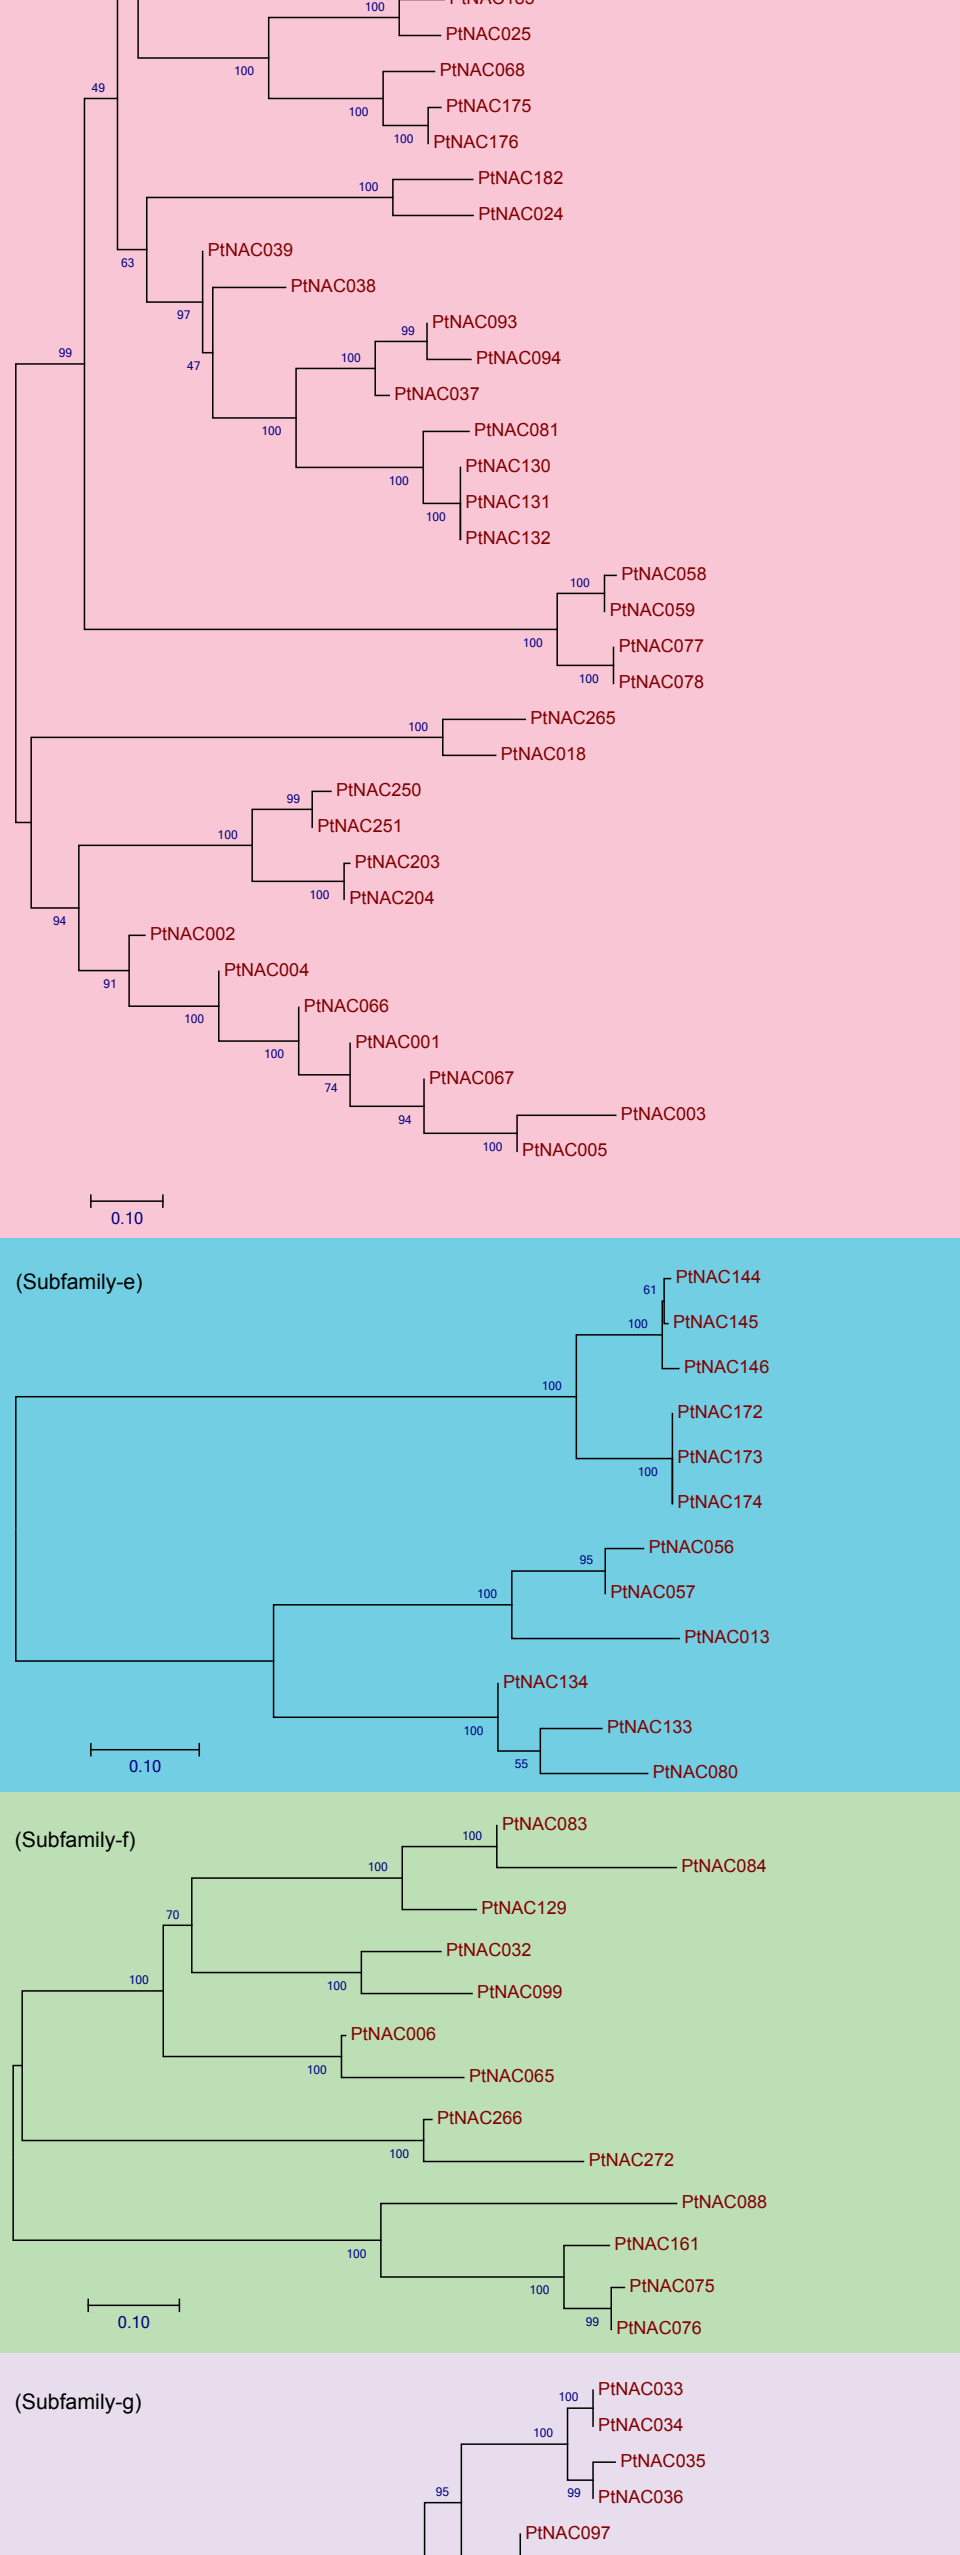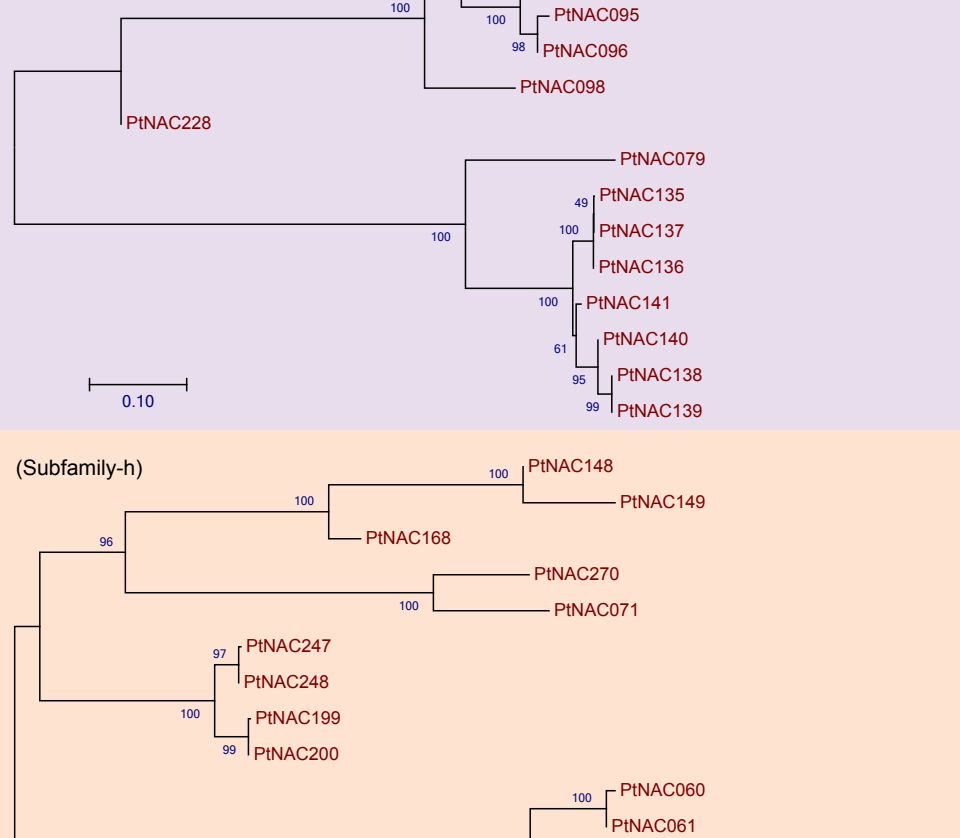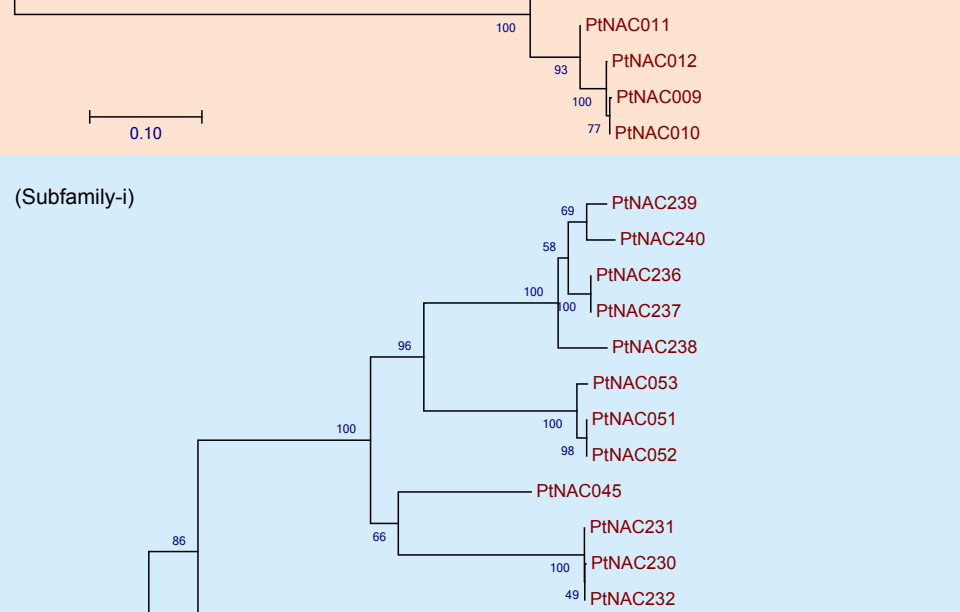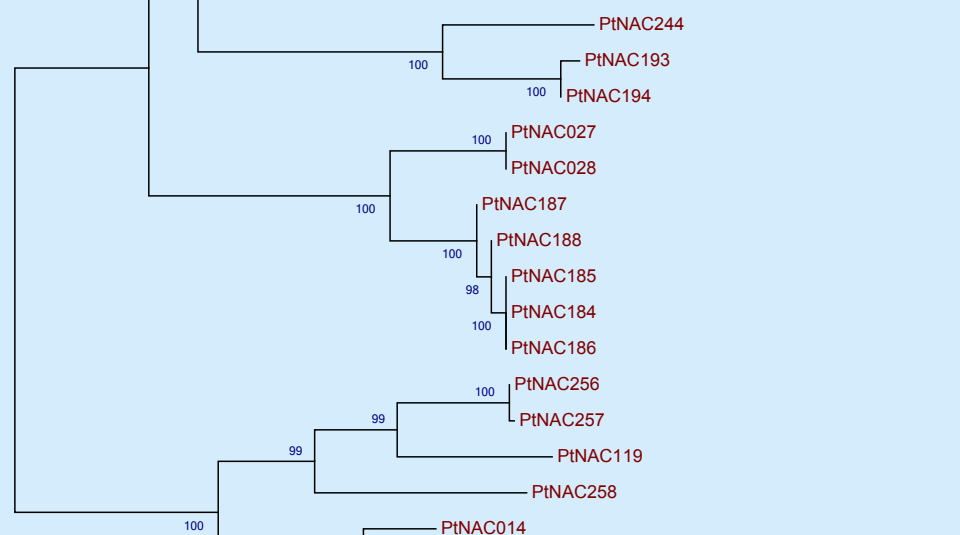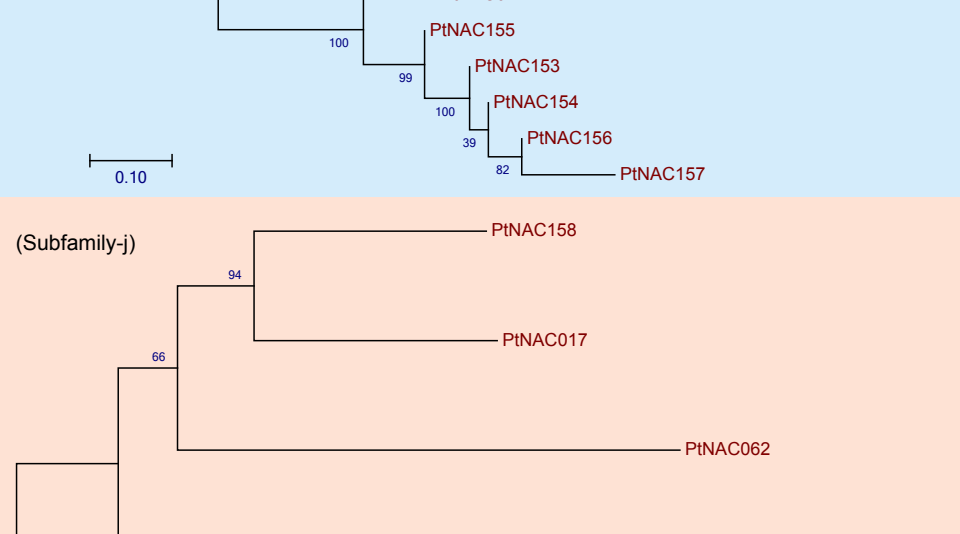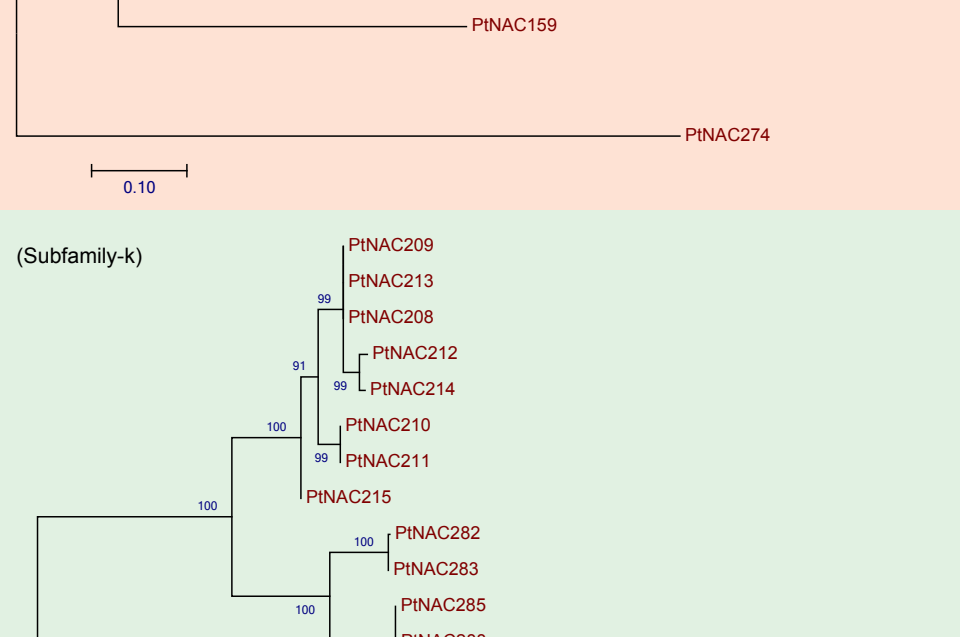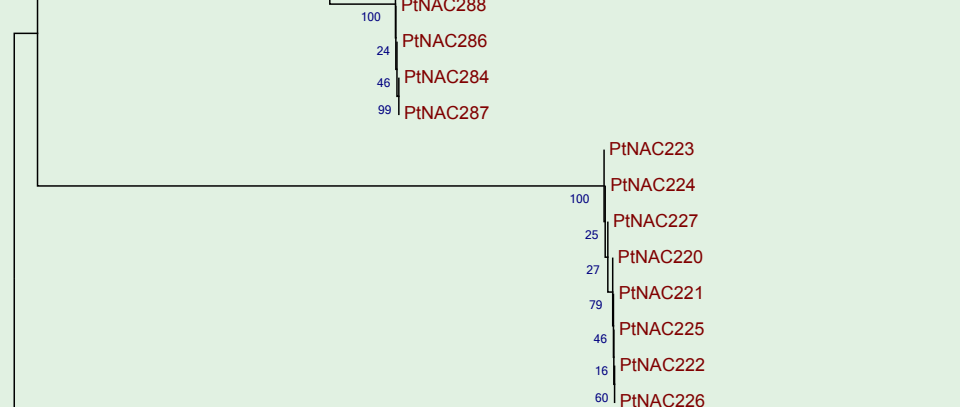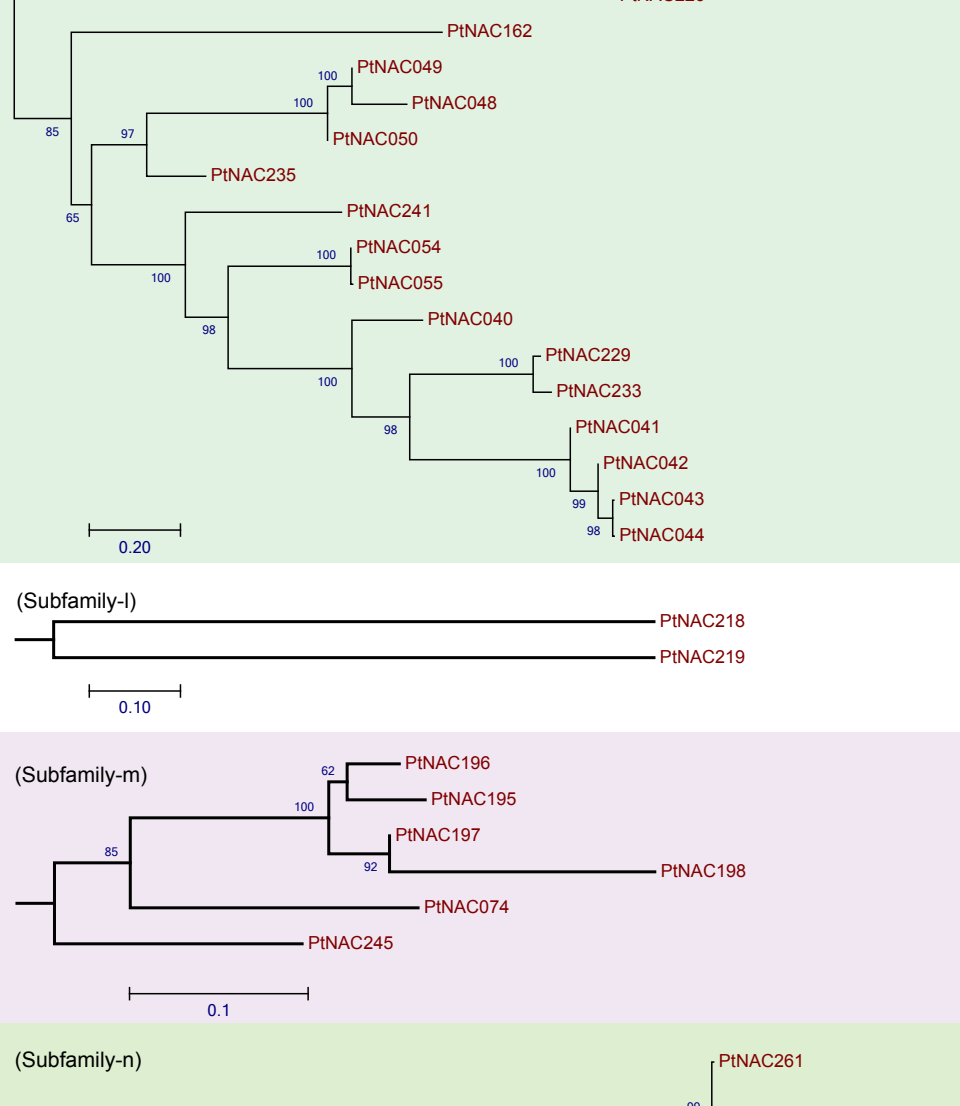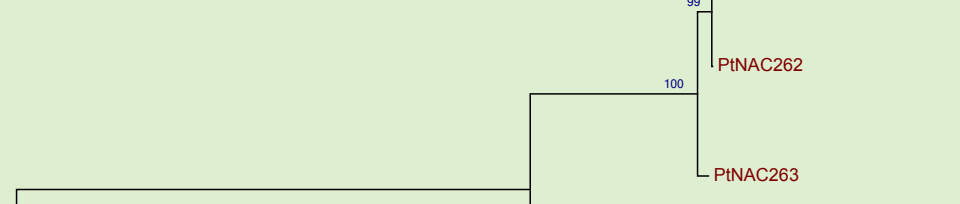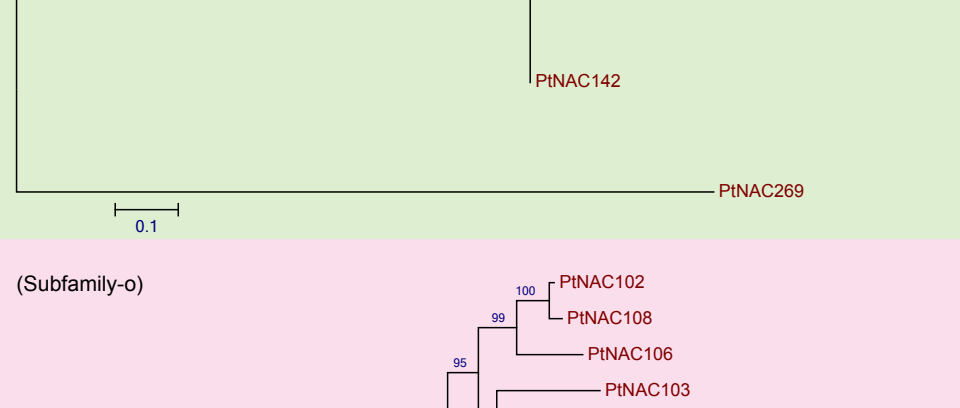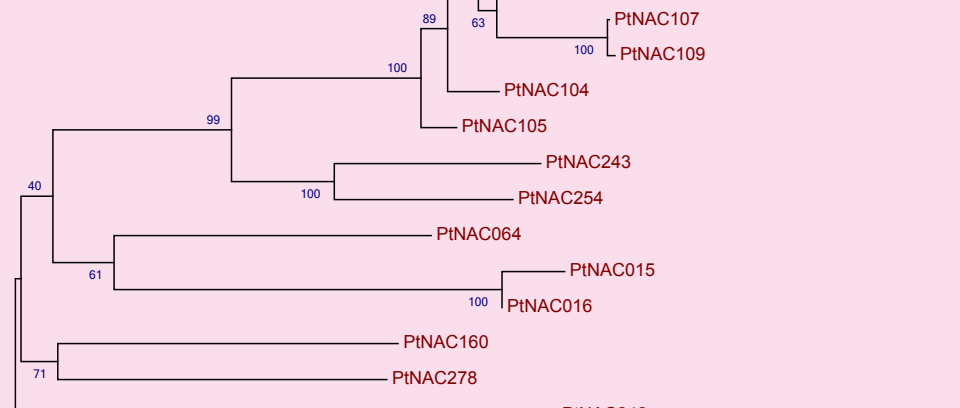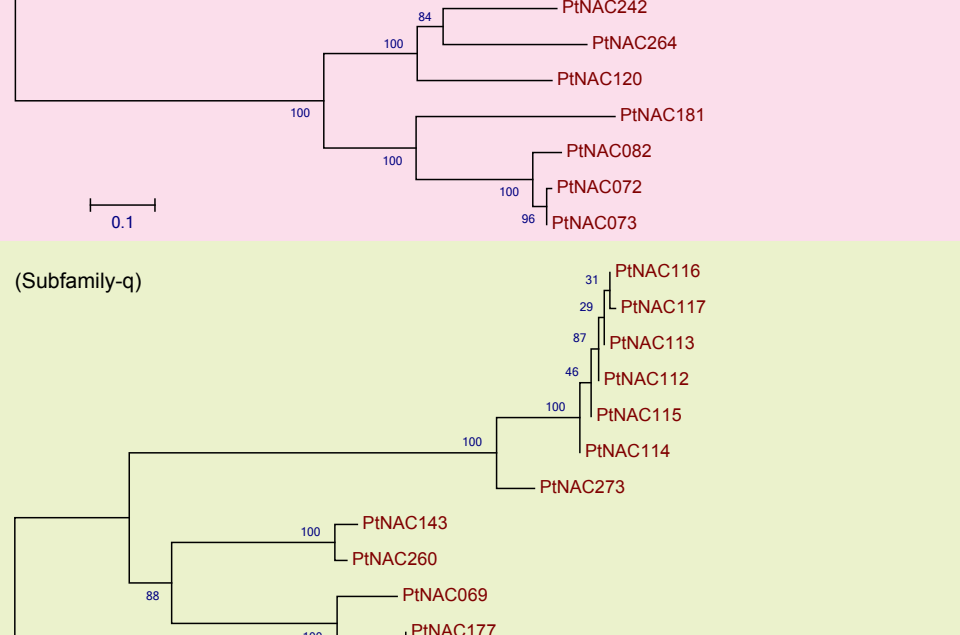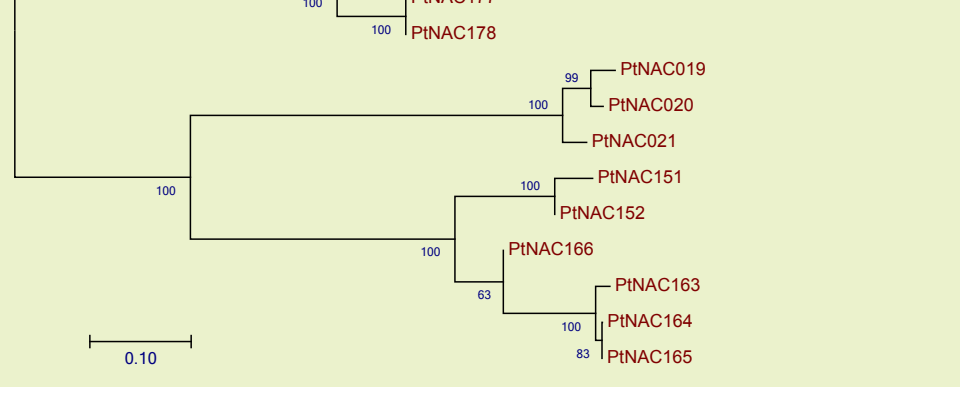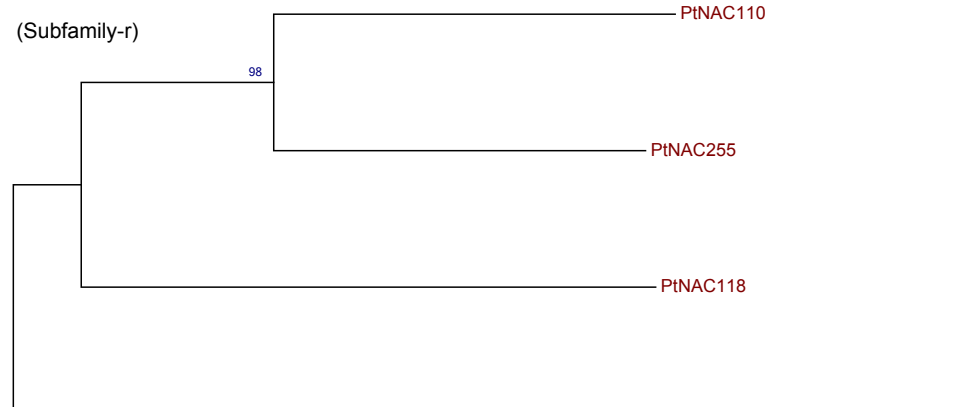

Supplement: s1 [file s1]

# 95% family-wise confidence level

(a)

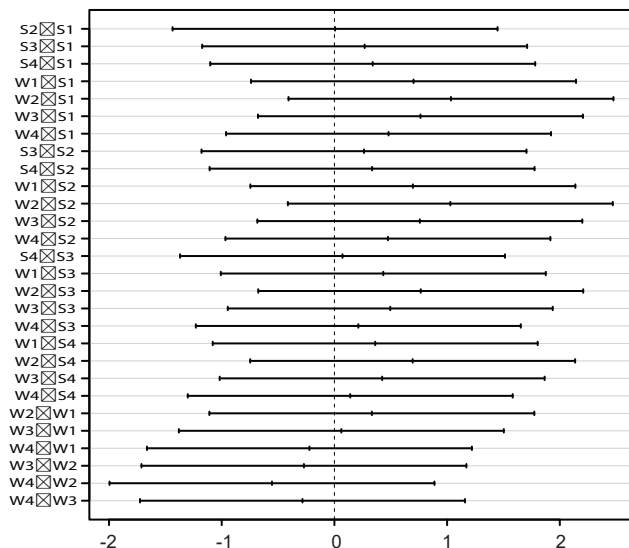

(b)

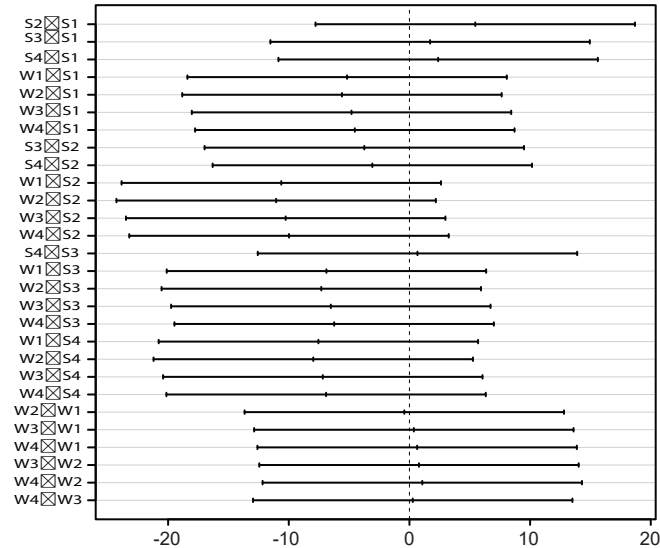

(c)

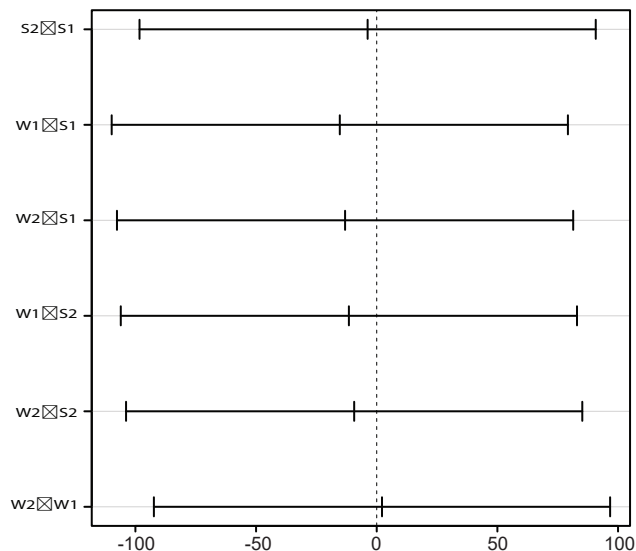

(d)

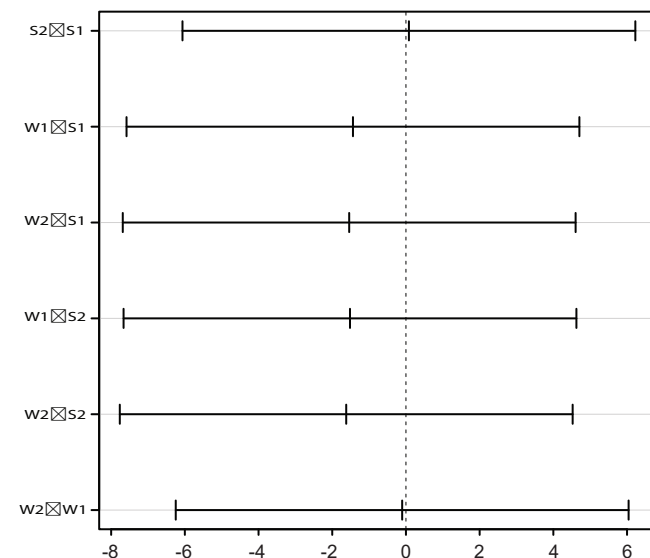

Differences in mean levels (FPKM) of groups

Supplement: s1 [file s1]

0.2

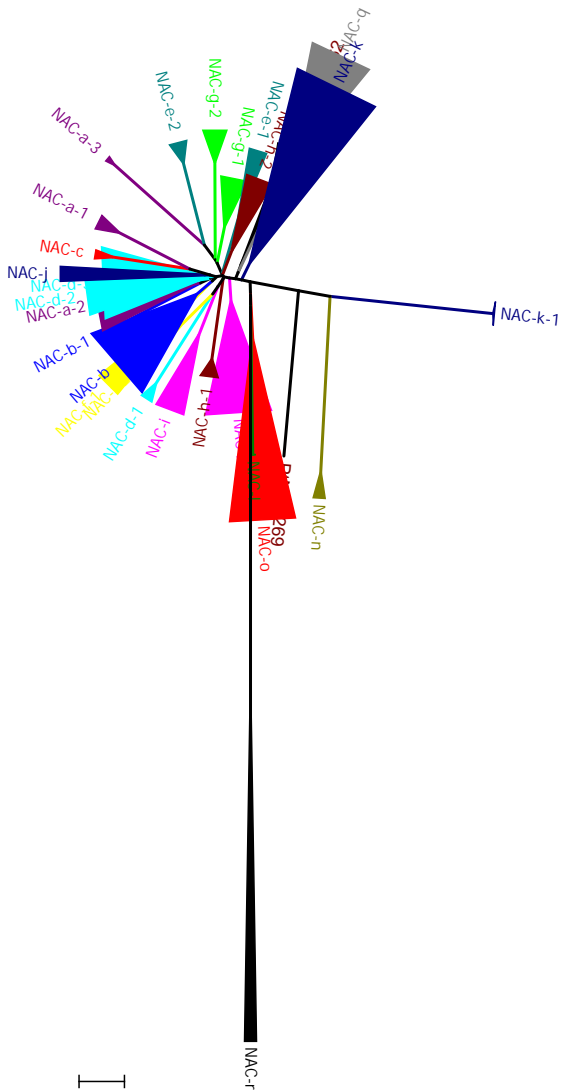

Supplement: s1 [file s1]

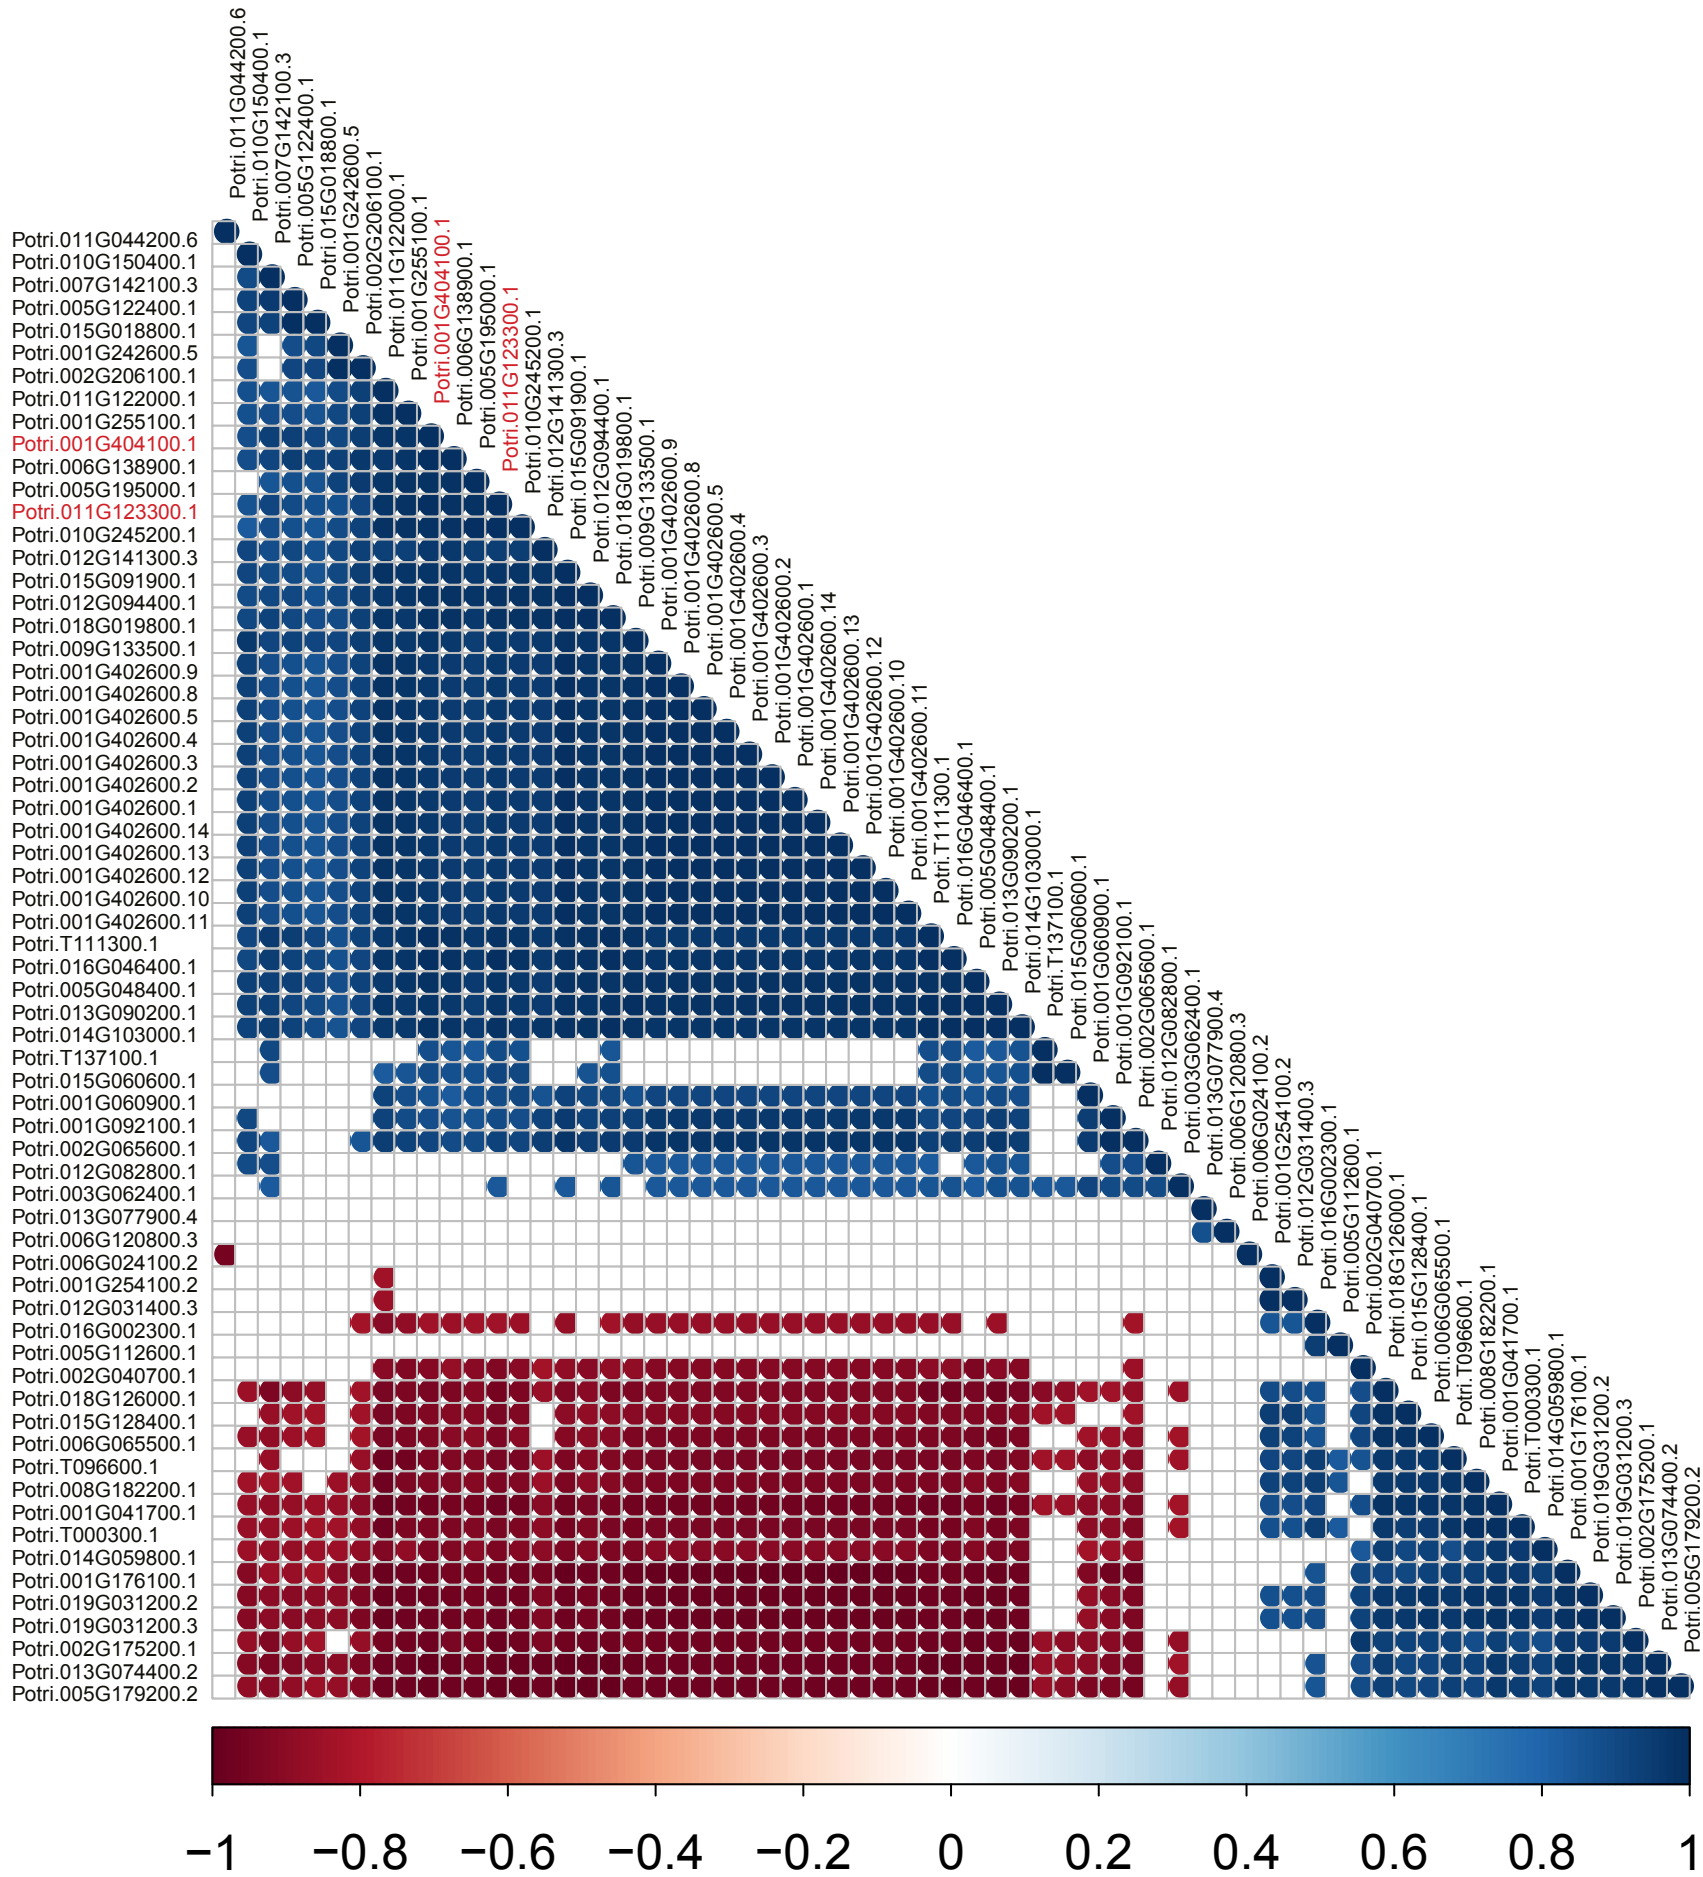

Supplement: s1 [file s1]

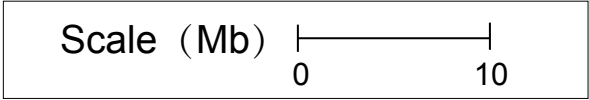

Linkage Group      Size (Mb)

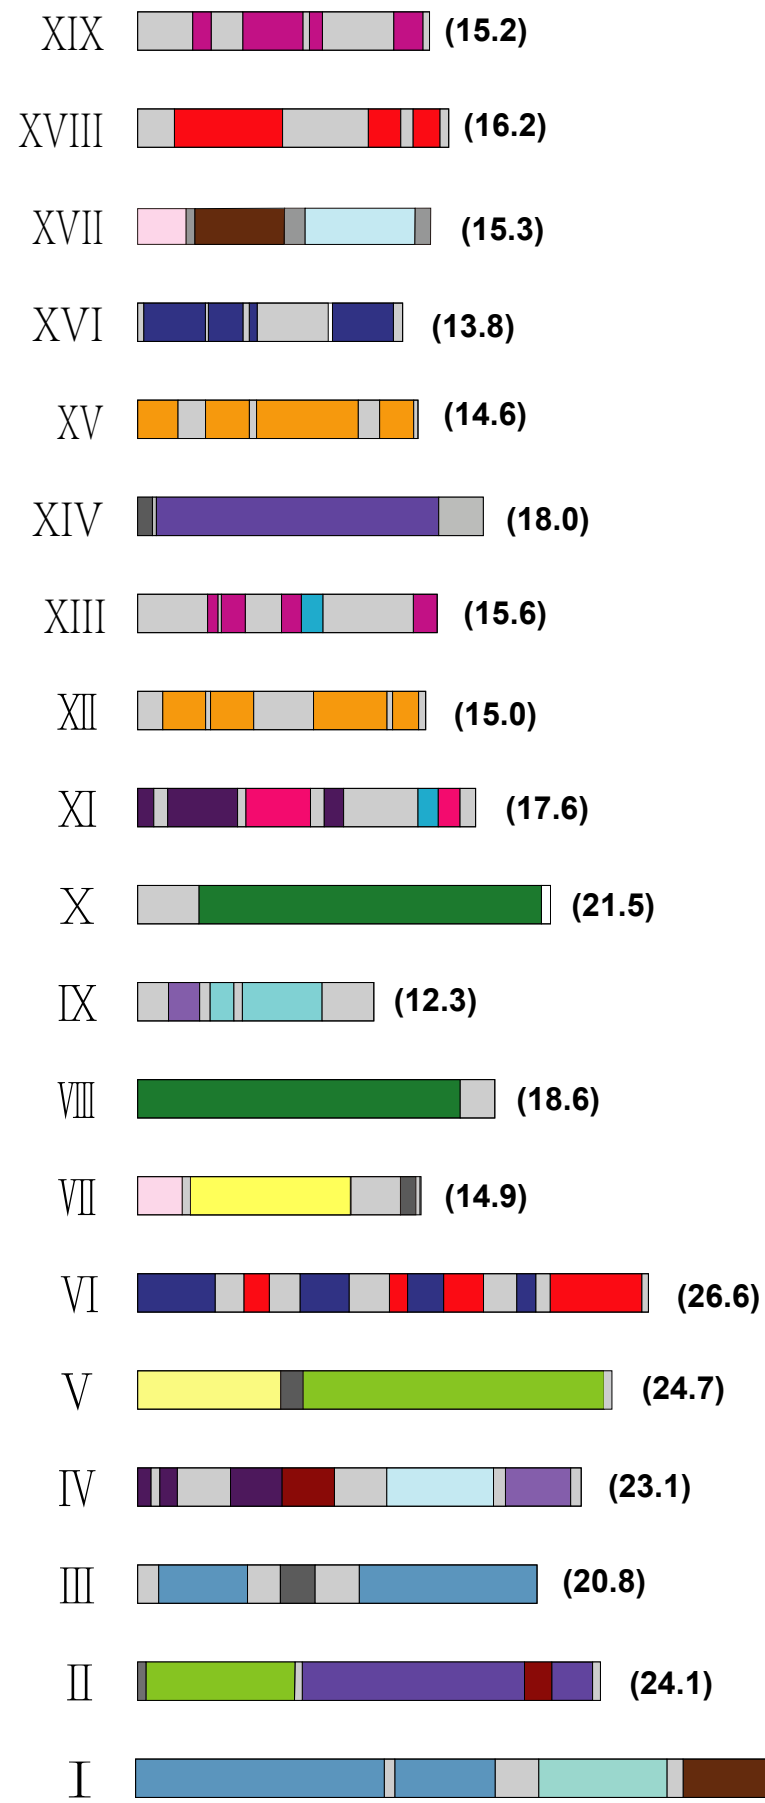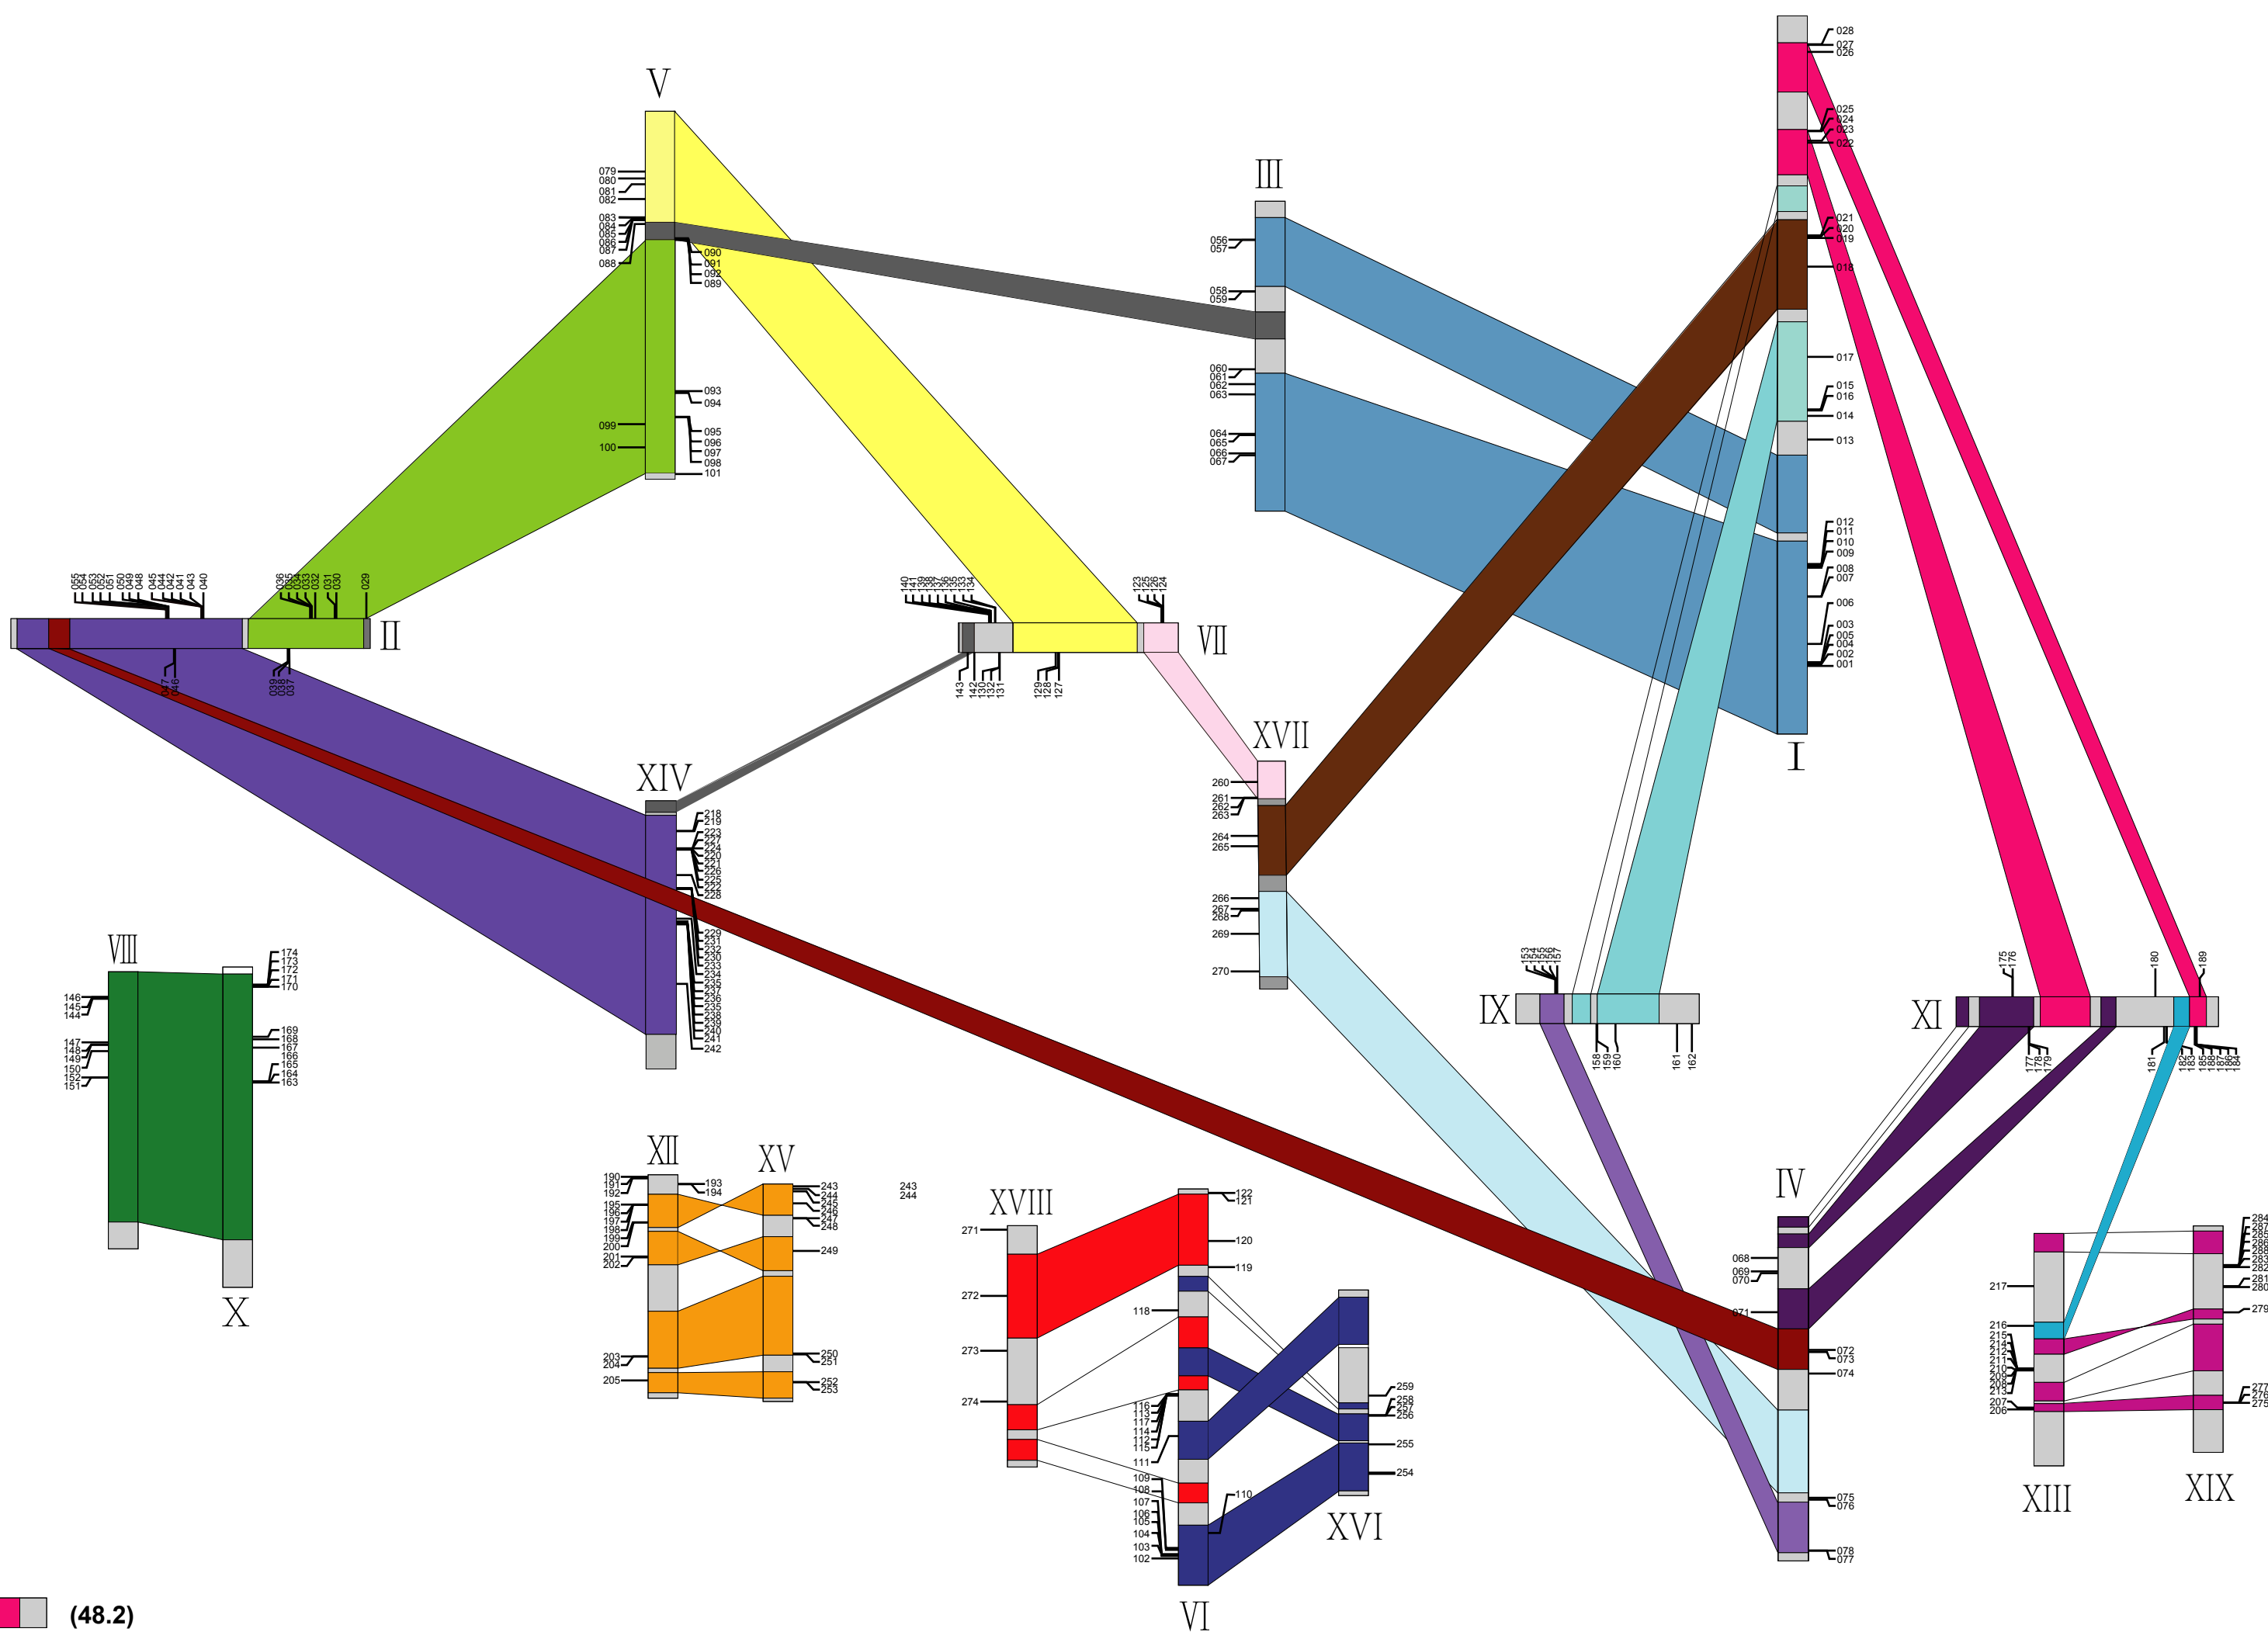

Supplement: s1 [file s1]
